# Supplementary material for: Ligand-assisted O-dealkylation of bis(bipyridyl) ruthenium(II) phosphine-ether complexes †
Source: Royal Society of Chemistry journal article supplement (doi:10.1039/b008931l), 2001-01-01
Supplement: b008931l.doc [file b008931l.doc]

**Rogers, Patrick, Rettig and Wolf. Ligand-assisted *O*-dealkylation….**

**Supplementary Table 1.** 31P NMR dataa and peak assignments for reactionsb of *P,O*-complexes with free POR. Asterisks denote relative intensities of peaks.

|  | POMe |  | POEt |  | PC2OMe |  |
| --- | --- | --- | --- | --- | --- | --- |
|  |  |  |  |  |  |  |
| free POR | -15.0 |  | -13.9 |  | -21.1 |  |
| [Me(POR)]+I- | 21.9 |  | 21.5 |  | 25.4 |  |
| [Et(POR)]+I- | 26.5 |  | 26.0 |  | 31.0 |  |
| Ru(POMe)c  55.0 | 55.0 **  51.9  21.7 **  -15.0 | Ru(PO-)  Ru(POMe)  [Me(POMe)]+  POMe | 55.0 **  52.6 *  51.9 *  21.7 *  21.3 **  -13.9 *  -15.0 | Ru(PO-)  Ru(POEt)  Ru(POMe)  [Me(POMe)]+  [Me(POEt)]+  POEt  POMe | 55.0 *  52.1 *  26.9  25.1 *  24.4  24.2  22.3 **  21.7 *  -15.0 *  -21.2 | Ru(PO-)  Ru(PC2OMe)  ligand-derived  [Me(PC2OMe)]+  mixed bisPR3  mixed bisPR3  Ru(PC2OMe)2  [Me(POMe)]+  POMe  PC2OMe |
| Ru(POEt)  52.6 | 55.0 **  52.6 *  51.9  21.7 *  21.3 **  -13.9 | Ru(PO-)  Ru(POEt)  Ru(POMe)  [Me(POMe)]+  [Me(POEt)]+  POEt | 55.0  52.6 **  25.7  24.2 *  -13.9 ** | Ru(PO-)  Ru(POEt)  [Et(POEt)]+  unassigned  POEt | 52.6 *  52.1 **  23.9  22.3 *  -13.9 * | Ru(POEt)  Ru(PC2OMe)  unassigned  Ru(PC2OMe)2  POEt |
| Ru(PC2OMe)  52.1 | 55.0  52.1 **  24.4 *  24.2 *  22.3 **  21.7  -15.0 * | Ru(PO-)  Ru(PC2OMe)  mixed bisPR3  mixed bisPR3  Ru(PC2OMe)2  [Me(POMe)]+  POMe | 52.6  52.1 **  23.9 *  22.3 *  -13.9 ** | Ru(POEt)  Ru(PC2OMe)  unassigned  Ru(PC2OMe)2  POEt | 52.1 *  26.9  22.2 **  -21.1 | Ru(PC2OMe)  ligand-derived  Ru(PC2OMe)2  PC2OMe |

a  values ± 0.4 ppm as determined from variation between experiments. b Conditions: 1:1 stoichiometry, refluxing acetone solution, 18 h. NMR spectra obtained in acetone-*d6* after removal of acetone-*h6*. c Reaction time = 48 h for Ru(POMe) + PC2OMe.

**Supplementary Experimental Details: Preparation of the Phosphonium Salts.**

**[Me(POMe)]I.**

An excess of MeI (0.10 mL, 1.61 mmol) was added to a solution of 2-methoxyphenyldiphenylphosphine (0.197 g, 0.673 mmol) in dry diethyl ether (30 mL) under nitrogen. The mixture immediately became cloudy upon formation of the insoluble phosphonium salt. The mixture was stirred overnight then evaporated to dryness to remove excess MeI. The residue was suspended in ether and the white powder collected by filtration, washed with ether and hexanes, and dried by suction. Yield: 100 %. 31P{1H} NMR (81.0 MHz, 25°C, acetone-*d6*): 21.9 (s). 1H NMR (200 MHz, 25°C, acetone-*d6*): 7.97 – 7.72 (m, 11H), 7.50 – 7.43 (m, 1H), 7.30 – 7.23 (m, 2H), 3.86 (s, 3H, MeO), 3.14 (d, 2*J*PH= 14.4 Hz, 3H).Elemental analysis: calcd. for C20H20IOP: C, 55.32; H, 4.64; found: C, 55.32; H, 4.69%.

**[Me(POEt)]I.**

Prepared as for [Me(POMe)]I using POEt. Yield: 58 %. 31P{1H} NMR (81.0 MHz, 25°C, acetone-*d6*): 21.5 (s). 1H NMR (200 MHz, 25°C, acetone-*d6*): 7.96 – 7.33 (m, 11H), 7.45 – 7.17 (m, 3H), 4.16 (q, *J* = 7.0 Hz, 2H), 3.13 (d, 2*J*PH= 14.1 Hz, 3H), 0.99 (t, *J* = 7.0 Hz, 3H).Elemental analysis: calcd. for C21H22IOP: C, 56.27; H, 4.95; found: C, 56.27; H, 4.90%.

**[Me(PC2OMe)]I.**

Prepared as for [Me(POMe)]I using PC2OMe. Yield: 40%. Recrystallized from acetone-ether. 31P{1H} NMR (81.0 MHz, 25°C, acetone-*d6*): 25.4 (s). 1H NMR (200 MHz, 25°C, acetone-*d6*): 8.16 – 7.94 (m, 4H), 7.90 – 7.62 (m, 6H), 3.85 – 3.62 (m, 4H), 3.19 (s, 3H, MeO), 2.87 (d, 2*J*PH= 14.4 Hz, 3H).Elemental analysis: calcd. for C16H20IOP: C, 49.76; H, 5.22; found: C, 49.54; H, 5.35%.

**[Et(POMe)]I.**

EtI (6.88 mmol) was added to a solution of 2-methoxyphenyldiphenylphosphine (0.197 g, 0.673 mmol) in dry diethyl ether (30 mL) under nitrogen. The mixture was heated to reflux and monitored by TLC (silica/ether). After 2 d, the mixture was evaporated to dryness to remove solvent and unreacted EtI. The residue was suspended in ether and the white powder collected by filtration, washed with ether and hexanes, and dried by suction. Yield: 0.27 g (87 %). 31P{1H} NMR (81.0 MHz, 25°C, acetone-*d6*): 26.5 (s). 1H NMR (200 MHz, 25°C, acetone-*d6*): 7.97 – 7.27 (m, 14H), 3.84 (s, 3H, MeO), 3.97 – 7.27 (m, 2H), 1.34 (dt, *J* = 7.50, 3*J*PH= 20.4 Hz, 3H).Elemental analysis: calcd. for C21H22IOP: C, 56.26; H, 4.95; found: C, 55.98; H, 4.96%.

**[Et(POEt)]I.**

Prepared as for [Et(POMe)]I using POEt. Yield: 82 %. 31P{1H} NMR (81.0 MHz, 25°C, acetone-*d6*): 26.0 (s). 1H NMR (200 MHz, 25°C, acetone-*d6*): 7.98 – 7.26 (m, 14H), 4.16 (q, *J* = 6.99 Hz, 2H), 3.73 – 3.55 (m, 2H), 1.34 (dt, *J*= 7.53, 3*J*PH = 20.2 Hz, 3H), 0.98 (t, *J* = 6.99 Hz, 3H).Elemental analysis: calcd. for C22H24IOP: C, 57.16; H, 5.23; found: C, 57.08; H, 5.14%.

**[Et(PC2OMe)]I.**

Prepared as for [Et(POMe)]I using PC2OMe. Yield: 87 %. Recrystallized from acetone-ether. 31P{1H} NMR (81.0 MHz, 25°C, acetone-*d6*): 31.0 (s). 1H NMR (200 MHz, 25°C, acetone-*d6*): 8.08 – 7.71 (m, 10H), 3.76 – 3.52 (m, 4H), 3.37 – 3.19 (m, 2H), 3.17 (s, 3H, MeO), 1.24 (dt, *J* = 7.51 Hz, 3*J*PH= 20.0 Hz, 3H). Elemental analysis: calcd. for C17H22IOP: C, 51.02; H, 5.54; found: C, 50.96; H, 5.53%.
